# Supplementary material for: Comparison of robustness to outliers between robust poisson models and log-binomial models when estimating relative risks for common binary outcomes: a simulation study
Source: PubMed Central journal article supplement (PMC4079617; doi:10.1186/1471-2288-14-82), 2014-06-26
Supplement: 1471-2288-14-82-S1.pdf [file 1471-2288-14-82-S1.pdf]

## Description of 24 Scenarios for Data Generation

| $\beta_1 = \log(\text{RR})$ | P(Y=1) | Association between Z and Y: Linear <sup>1</sup> |           |                                        |           | Association between Z and Y: Non-Linear <sup>2</sup> |           |                                        |           |
|-----------------------------|--------|--------------------------------------------------|-----------|----------------------------------------|-----------|------------------------------------------------------|-----------|----------------------------------------|-----------|
|                             |        | Level of association between Z and X, Z and Y    |           |                                        |           | Level of association between Z and X, Z and Y        |           |                                        |           |
|                             |        | Moderate: $\alpha_1 = \beta_2 = \log(2)$         |           | Strong: $\alpha_1 = \beta_2 = \log(4)$ |           | Moderate: $\alpha_1 = \beta_2 = \log(2)$             |           | Strong: $\alpha_1 = \beta_2 = \log(4)$ |           |
|                             |        | $\alpha_0$                                       | $\beta_0$ | $\alpha_0$                             | $\beta_0$ | $\alpha_0$                                           | $\beta_0$ | $\alpha_0$                             | $\beta_0$ |
| log(1.5)                    | 10%    | -0.5188                                          | -3.0518   | -1.0425                                | -3.5885   | -0.5188                                              | -3.2636   | -1.0425                                | -4.0302   |
|                             | 25%    |                                                  | -2.1349   |                                        | -2.6714   |                                                      | -2.3473   |                                        | -3.1136   |
|                             | 40%    |                                                  | -1.6649   |                                        | -2.2016   |                                                      | -1.8769   |                                        | -2.6440   |
| log(2.0)                    | 10%    |                                                  | -3.2346   |                                        | -3.7722   |                                                      | -3.4472   |                                        | -4.2161   |
|                             | 25%    |                                                  | -2.3191   |                                        | -2.8561   |                                                      | -2.5300   |                                        | -3.3006   |
|                             | 40%    |                                                  | -1.8485   |                                        | -2.3863   |                                                      | -2.0618   |                                        | -2.8298   |

$X$  is a binary treatment/exposure variable ( $X = 1$  for treatment/exposure and  $X = 0$  for non-treatment/non-exposure) from a binomial distribution with the probability of  $X = 1$  fixed at 50%.  $Y$  is a binary common outcome from a population with the probability of  $Y = 1$  varying from 10%, 25% to 40%.

$Z \sim \text{Beta}(6, 2)$

For all scenarios:  $\text{logit}(p_x) = \alpha_0 + \alpha_1 Z$

<sup>1</sup>Linear confounder  $Z$ :  $\log(p_y) = \beta_0 + \beta_1 X + \beta_2 Z$

<sup>2</sup>Non-linear confounder  $Z$ :  $\log(p_y) = \beta_0 + \beta_1 X + \beta_2 Z + (0.5 \times \beta_2) Z^2$
