# Supplementary material for: Comparison of robustness to outliers between robust poisson models and log-binomial models when estimating relative risks for common binary outcomes: a simulation study
Source: PubMed Central journal article supplement (PMC4079617; doi:10.1186/1471-2288-14-82), 2014-06-26
Supplement: 1471-2288-14-82-S2.pdf [file 1471-2288-14-82-S2.pdf]

Table A1. Relative Bias (%) in Log Scale When n=500

| RR  | Prob (Y=1) | Contamination Rate | Association bet Z and Y: Linear                     |                        | Association bet Z and Y: Linear                   |                       | Association bet Z and Y: Non-Linear                 |                       | Association bet Z and Y: Non-Linear               |                        |
|-----|------------|--------------------|-----------------------------------------------------|------------------------|---------------------------------------------------|-----------------------|-----------------------------------------------------|-----------------------|---------------------------------------------------|------------------------|
|     |            |                    | Level of association bet Z and X, Z and Y: Moderate |                        | Level of association bet Z and X, Z and Y: Strong |                       | Level of association bet Z and X, Z and Y: Moderate |                       | Level of association bet Z and X, Z and Y: Strong |                        |
|     |            |                    | LB                                                  | PR                     | LB                                                | RP                    | LB                                                  | RP                    | LB                                                | RP                     |
| 1.5 | 10%        | 0%<br>2%<br>5%     | 3.1<br>-17.3<br>-43.0                               | 3.2<br>-15.5<br>-35.3  | 4.4<br>-14.2<br>-40.6                             | 4.4<br>-13.8<br>-35.1 | 0.4<br>-28.1<br>-51.8                               | 0.4<br>-17.8<br>-39.7 | 0.1<br>-24.7<br>-46.8                             | -0.1<br>-17.2<br>-39.0 |
|     | 25%        | 0%<br>2%<br>5%     | 0.0<br>-9.9<br>-25.4                                | -0.4<br>-10.3<br>-24.2 | 1.3<br>-9.5<br>-27.0                              | 1.2<br>-10.7<br>-27.3 | 3.4<br>-11.3<br>-32.2                               | 3.4<br>-8.8<br>-25.3  | -0.5<br>-18.1<br>-43.6                            | -0.6<br>-15.4<br>-35.9 |
|     | 40%        | 0%<br>2%<br>5%     | 0.2<br>-7.9<br>-19.7                                | 0.1<br>-8.2<br>-19.6   | 0.2<br>-8.8<br>-22.4                              | 0.2<br>-10.0<br>-23.5 | 1.0<br>-9.6<br>-26.1                                | 0.8<br>-9.1<br>-23.7  | 1.4<br>-14.2<br>-36.0                             | 1.2<br>-12.2<br>-31.2  |
| 2.0 | 10%        | 0%<br>2%<br>5%     | 2.1<br>-17.7<br>-40.4                               | 2.1<br>-16.6<br>-35.6  | 4.0<br>-15.6<br>-39.7                             | 4.0<br>-15.0<br>-35.3 | 2.4<br>-21.5<br>-43.8                               | 2.4<br>-14.4<br>-35.5 | 2.6<br>-22.0<br>-45.5                             | 2.7<br>-15.4<br>-37.0  |
|     | 25%        | 0%<br>2%<br>5%     | 0.1<br>-9.7<br>-24.0                                | 0.1<br>-9.8<br>-22.6   | 0.3<br>-9.2<br>-23.8                              | 0.2<br>-9.7<br>-23.4  | 0.3<br>-12.2<br>-29.4                               | 0.3<br>-10.1<br>-24.0 | 2.0<br>-12.3<br>-33.1                             | 1.8<br>-10.0<br>-26.9  |
|     | 40%        | 0%<br>2%<br>5%     | -0.9<br>-7.7<br>-17.8                               | -0.9<br>-7.9<br>-17.5  | 0.6<br>-6.7<br>-18.2                              | 0.5<br>-7.3<br>-18.6  | 0.2<br>-8.3<br>-21.0                                | 0.2<br>-7.7<br>-19.1  | -0.3<br>-11.0<br>-26.7                            | -0.1<br>-10.0<br>-24.1 |

Association between Z and X always linear

LB: Log-Binomial Model

RP: Robust Poisson

Relative bias was defined as the average of the 1,000 estimated RR in log scale minus the log of the true RR divided by the log of the true RR.

Table A2. Standard Error in Log Scale When n=500

| RR  | Prob (Y=1) | Contamination Rate | Association bet Z and Y: Linear<br>Level of association bet Z and X, Z and Y: Moderate |      | Association bet Z and Y: Linear<br>Level of association bet Z and X, Z and Y: Strong |      | Association bet Z and Y: Non-Linear<br>Level of association bet Z and X, Z and Y: Moderate |      | Association bet Z and Y: Non-Linear<br>Level of association bet Z and X, Z and Y: Strong |      |
|-----|------------|--------------------|----------------------------------------------------------------------------------------|------|--------------------------------------------------------------------------------------|------|--------------------------------------------------------------------------------------------|------|------------------------------------------------------------------------------------------|------|
|     |            |                    | LB                                                                                     | PR   | LB                                                                                   | RP   | LB                                                                                         | RP   | LB                                                                                       | RP   |
| 1.5 | 10%        | 0%                 | 0.27                                                                                   | 0.27 | 0.29                                                                                 | 0.29 | 0.29                                                                                       | 0.29 | 0.28                                                                                     | 0.28 |
|     |            | 2%                 | 0.24                                                                                   | 0.24 | 0.25                                                                                 | 0.25 | 0.26                                                                                       | 0.26 | 0.25                                                                                     | 0.25 |
|     |            | 5%                 | 0.23                                                                                   | 0.21 | 0.23                                                                                 | 0.22 | 0.26                                                                                       | 0.23 | 0.24                                                                                     | 0.22 |
| 1.5 | 25%        | 0%                 | 0.17                                                                                   | 0.17 | 0.16                                                                                 | 0.16 | 0.17                                                                                       | 0.17 | 0.16                                                                                     | 0.16 |
|     |            | 2%                 | 0.17                                                                                   | 0.17 | 0.16                                                                                 | 0.16 | 0.16                                                                                       | 0.16 | 0.16                                                                                     | 0.16 |
|     |            | 5%                 | 0.16                                                                                   | 0.16 | 0.15                                                                                 | 0.15 | 0.16                                                                                       | 0.15 | 0.15                                                                                     | 0.15 |
| 1.5 | 40%        | 0%                 | 0.11                                                                                   | 0.11 | 0.11                                                                                 | 0.11 | 0.11                                                                                       | 0.11 | 0.11                                                                                     | 0.11 |
|     |            | 2%                 | 0.11                                                                                   | 0.11 | 0.11                                                                                 | 0.11 | 0.11                                                                                       | 0.11 | 0.11                                                                                     | 0.11 |
|     |            | 5%                 | 0.11                                                                                   | 0.11 | 0.11                                                                                 | 0.11 | 0.11                                                                                       | 0.10 | 0.11                                                                                     | 0.11 |
| 2.0 | 10%        | 0%                 | 0.30                                                                                   | 0.30 | 0.30                                                                                 | 0.30 | 0.30                                                                                       | 0.30 | 0.30                                                                                     | 0.30 |
|     |            | 2%                 | 0.27                                                                                   | 0.26 | 0.26                                                                                 | 0.25 | 0.27                                                                                       | 0.26 | 0.26                                                                                     | 0.26 |
|     |            | 5%                 | 0.24                                                                                   | 0.23 | 0.24                                                                                 | 0.22 | 0.25                                                                                       | 0.23 | 0.25                                                                                     | 0.23 |
| 2.0 | 25%        | 0%                 | 0.17                                                                                   | 0.17 | 0.17                                                                                 | 0.17 | 0.17                                                                                       | 0.17 | 0.17                                                                                     | 0.18 |
|     |            | 2%                 | 0.16                                                                                   | 0.16 | 0.17                                                                                 | 0.17 | 0.17                                                                                       | 0.16 | 0.17                                                                                     | 0.17 |
|     |            | 5%                 | 0.16                                                                                   | 0.15 | 0.16                                                                                 | 0.16 | 0.16                                                                                       | 0.15 | 0.16                                                                                     | 0.16 |
| 2.0 | 40%        | 0%                 | 0.12                                                                                   | 0.12 | 0.12                                                                                 | 0.12 | 0.12                                                                                       | 0.12 | 0.12                                                                                     | 0.12 |
|     |            | 2%                 | 0.12                                                                                   | 0.12 | 0.11                                                                                 | 0.12 | 0.12                                                                                       | 0.12 | 0.12                                                                                     | 0.12 |
|     |            | 5%                 | 0.11                                                                                   | 0.11 | 0.11                                                                                 | 0.11 | 0.12                                                                                       | 0.11 | 0.12                                                                                     | 0.12 |

Association between Z and X always linear

LB: Log-Binomial Model

RP: Robust Poisson

Standard error was defined as the empirical standard error of the estimated RR in log scale over all 1,000 simulations.

Table A3. Mean Square Error (MSE) in Log Scale When n=500

| RR  | Prob (Y=1) | Contamination Rate | Association bet Z and Y: Linear                     |       | Association bet Z and Y: Linear                   |       | Association bet Z and Y: Non-Linear                 |       | Association bet Z and Y: Non-Linear               |       |
|-----|------------|--------------------|-----------------------------------------------------|-------|---------------------------------------------------|-------|-----------------------------------------------------|-------|---------------------------------------------------|-------|
|     |            |                    | Level of association bet Z and X, Z and Y: Moderate |       | Level of association bet Z and X, Z and Y: Strong |       | Level of association bet Z and X, Z and Y: Moderate |       | Level of association bet Z and X, Z and Y: Strong |       |
|     |            |                    | LB                                                  | PR    | LB                                                | RP    | LB                                                  | RP    | LB                                                | RP    |
| 1.5 | 10%        | 0%                 | 0.073                                               | 0.073 | 0.082                                             | 0.082 | 0.083                                               | 0.083 | 0.077                                             | 0.077 |
|     |            | 2%                 | 0.063                                               | 0.061 | 0.066                                             | 0.066 | 0.082                                               | 0.072 | 0.072                                             | 0.067 |
|     |            | 5%                 | 0.083                                               | 0.065 | 0.079                                             | 0.068 | 0.111                                               | 0.079 | 0.094                                             | 0.074 |
| 1.5 | 25%        | 0%                 | 0.028                                               | 0.028 | 0.027                                             | 0.027 | 0.028                                               | 0.028 | 0.026                                             | 0.026 |
|     |            | 2%                 | 0.029                                               | 0.029 | 0.026                                             | 0.027 | 0.028                                               | 0.027 | 0.030                                             | 0.028 |
|     |            | 5%                 | 0.035                                               | 0.034 | 0.034                                             | 0.034 | 0.042                                               | 0.034 | 0.053                                             | 0.043 |
| 1.5 | 40%        | 0%                 | 0.013                                               | 0.013 | 0.012                                             | 0.012 | 0.012                                               | 0.012 | 0.013                                             | 0.013 |
|     |            | 2%                 | 0.013                                               | 0.013 | 0.013                                             | 0.014 | 0.013                                               | 0.013 | 0.016                                             | 0.015 |
|     |            | 5%                 | 0.018                                               | 0.018 | 0.020                                             | 0.021 | 0.022                                               | 0.020 | 0.034                                             | 0.028 |
| 2.0 | 10%        | 0%                 | 0.087                                               | 0.087 | 0.089                                             | 0.089 | 0.092                                               | 0.092 | 0.091                                             | 0.091 |
|     |            | 2%                 | 0.088                                               | 0.083 | 0.077                                             | 0.075 | 0.098                                               | 0.082 | 0.092                                             | 0.079 |
|     |            | 5%                 | 0.138                                               | 0.113 | 0.131                                             | 0.110 | 0.156                                               | 0.113 | 0.164                                             | 0.119 |
| 2.0 | 25%        | 0%                 | 0.029                                               | 0.029 | 0.029                                             | 0.030 | 0.029                                               | 0.029 | 0.031                                             | 0.031 |
|     |            | 2%                 | 0.031                                               | 0.031 | 0.032                                             | 0.032 | 0.034                                               | 0.031 | 0.036                                             | 0.034 |
|     |            | 5%                 | 0.053                                               | 0.049 | 0.052                                             | 0.051 | 0.066                                               | 0.051 | 0.079                                             | 0.061 |
| 2.0 | 40%        | 0%                 | 0.015                                               | 0.015 | 0.014                                             | 0.014 | 0.015                                               | 0.015 | 0.014                                             | 0.014 |
|     |            | 2%                 | 0.017                                               | 0.017 | 0.015                                             | 0.016 | 0.017                                               | 0.017 | 0.020                                             | 0.019 |
|     |            | 5%                 | 0.028                                               | 0.027 | 0.028                                             | 0.029 | 0.035                                               | 0.031 | 0.048                                             | 0.041 |

Association between Z and X always linear

LB: Log-Binomial Model

RP: Robust Poisson

Mean square error (MSE) was calculated by taking the sum of the squared bias in log scale and the variances.
